# Supplementary material for: Enhanced Cartilage and Subchondral Bone Repair Using Carbon Nanotube-Doped Peptide Hydrogel–Polycaprolactone Composite Scaffolds
Source: MDPI journal article supplement (doi:10.3390/pharmaceutics15082145), 2023-08-15
Supplement: s1 [file s1]

# **Enhanced Cartilage and Subchondral Bone Repair using Carbon Nanotube-doped Peptide Hydrogel-Polycaprolactone Composite Scaffolds**

Jiayi Lv<sup>a</sup>, Yilun Wu<sup>a</sup>, Zhicheng Cao<sup>b</sup>, Xu Liu<sup>a</sup>, Yuzhi Sun<sup>b</sup>, Po Zhang<sup>b</sup>, Xin Zhang<sup>b</sup>, Kexin Tang<sup>c</sup>, Min Cheng<sup>a</sup>, Qingqiang Yao<sup>b\*</sup>, Yishen Zhu<sup>a\*</sup>

\*Corresponding authors

a. College of Biotechnology and Pharmaceutical Engineering, Nanjing Tech University, 211816, Nanjing, China

b. Department of Orthopaedic Surgery, Institute of Digital Medicine, Nanjing First Hospital, Nanjing Medical University, 210006, Nanjing, China

c. College of Pharmaceutical Sciences, Nanjing Tech University, 211816, Nanjing, China

E-mail: yaoqingqiang@njmu.edu.cn (Q.Y.); zhuyish@njtech.edu.cn (Y.Z.);

Tel: +86-18900660563 (Y.Z.)

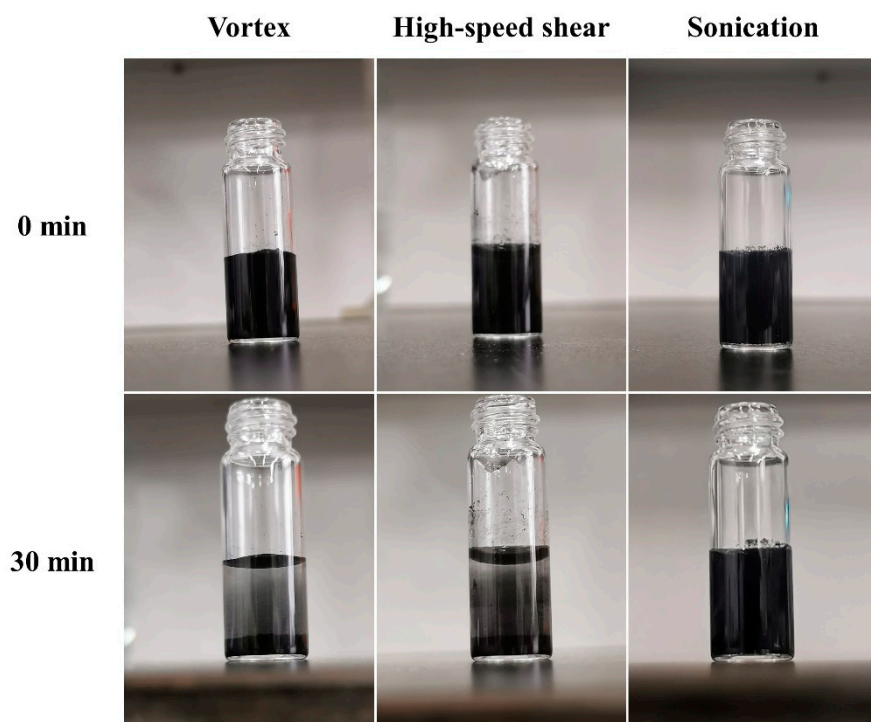

**Figure S1.** Images of CNT dispersions prepared by different processing methods.

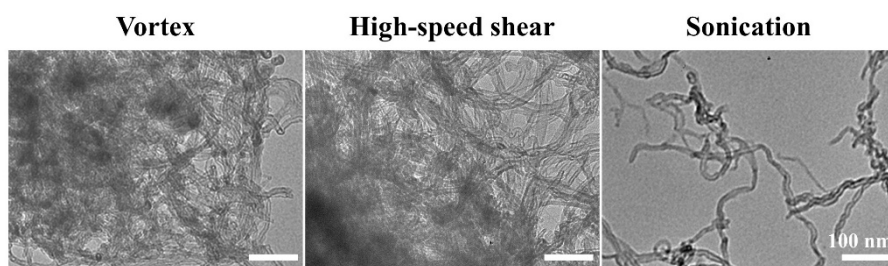

**Figure S2.** TEM images of CNTs with different processing methods.

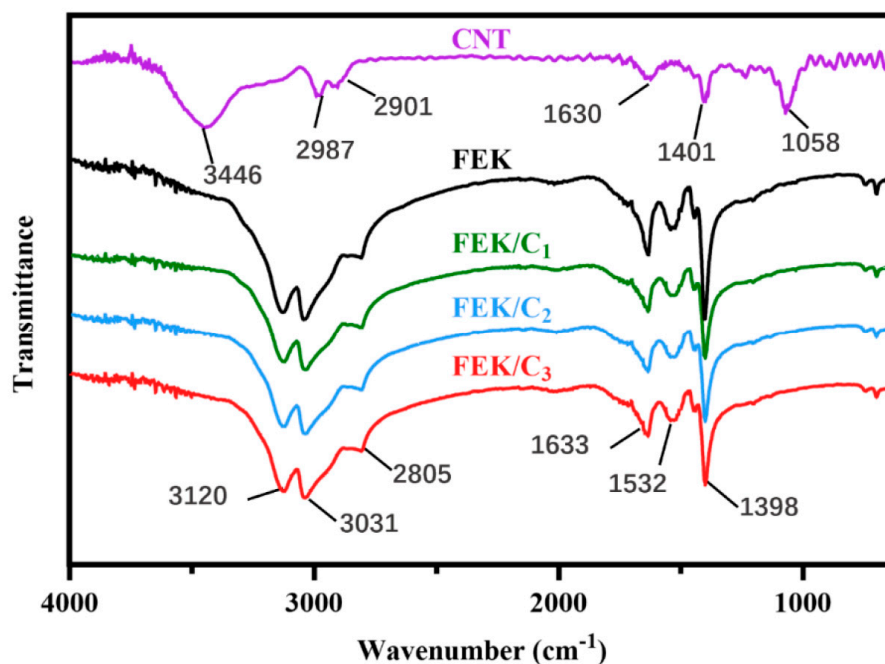

**Figure S3.** FTIR spectrum of hydrogels with different CNT concentrations. The corresponding peaks of CNT: O-H stretching vibration peak ( $3446\text{cm}^{-1}$ ) from  $\text{H}_2\text{O}$ ,  $-\text{CH}_2-$  stretching peak ( $2987$  and  $2901\text{ cm}^{-1}$ ) and C-C stretching vibration peak ( $1401\text{ cm}^{-1}$ ) from the backbone of CNT, C=O stretching vibration peak ( $1630\text{ cm}^{-1}$ ) and C-O stretching vibration peak ( $1058\text{ cm}^{-1}$ ) from oxidative CNT. The peaks in the FEK/C spectra:  $-\text{NH}_2$  stretching vibration peak ( $3120$  and  $3031\text{ cm}^{-1}$ ),  $-\text{CH}_2-$  stretching vibration peak ( $2805\text{ cm}^{-1}$ ),  $-\text{NH}-$  bending vibration peak ( $1633\text{ cm}^{-1}$ ), and  $-\text{C-H}-$  bending vibration peak ( $1532\text{ cm}^{-1}$ ) from FEK octapeptide.

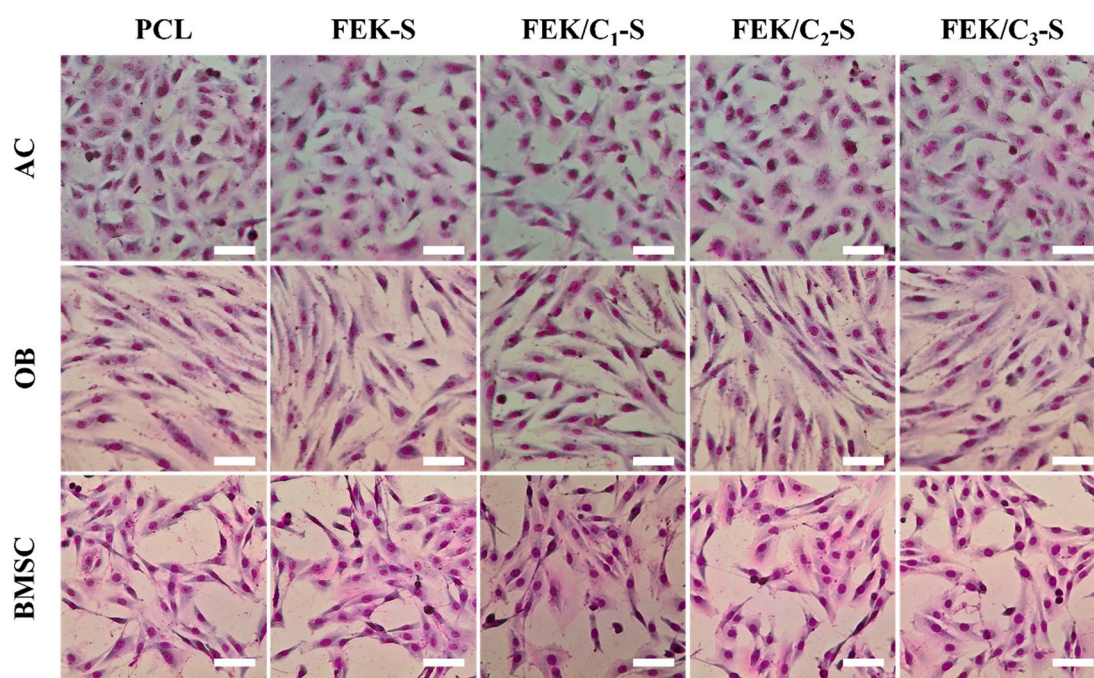

**Figure S4.** Giemsa staining of ACs, OBs, and BMSCs cultured on different scaffolds. Scale bar: 50  $\mu$ m.

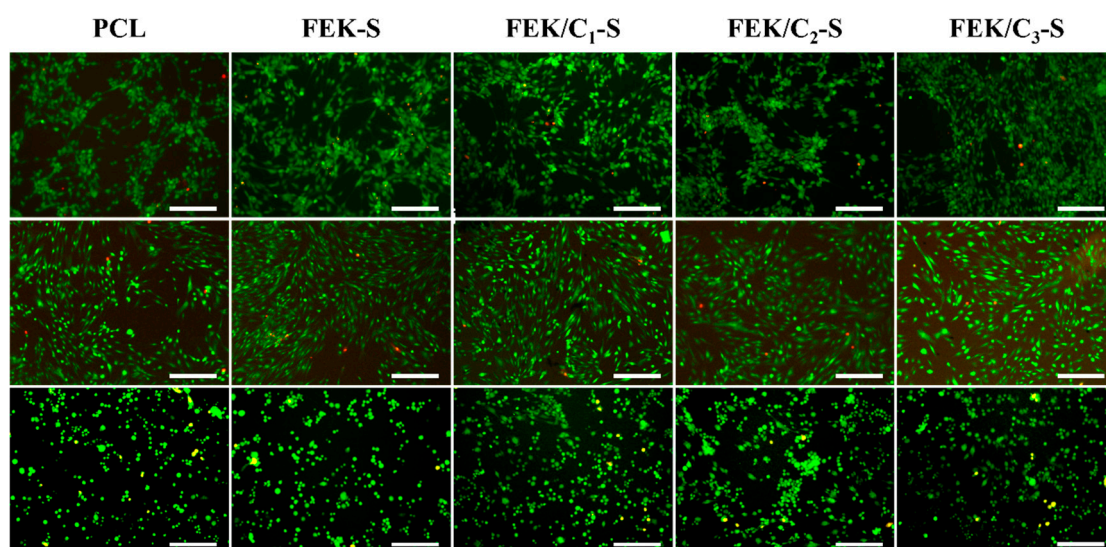

**Figure S5.** Livedead staining of ACs, OBs, and BMSCs cultured on different scaffolds. Scale bar: 200  $\mu$ m.

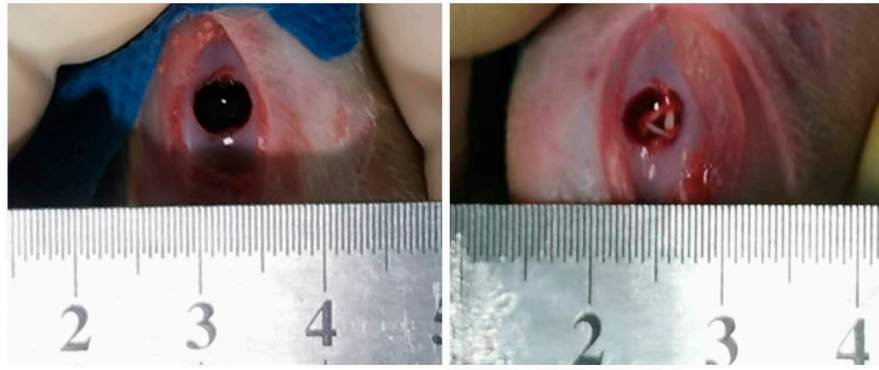

**Figure S6.** Typical images of (left) a rabbit knee with cartilage and subchondral bone defect and (right) scaffold implantation during the surgery.

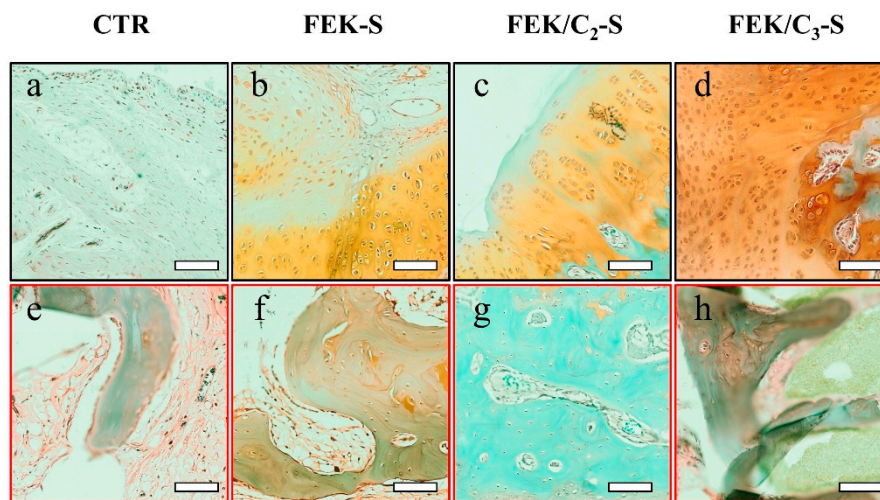

**Figure S7.** High magnification images of (a-d) cartilage and (e-h) subchondral bone with safranin-O/fast green staining. Scale bar: 100  $\mu$ m.

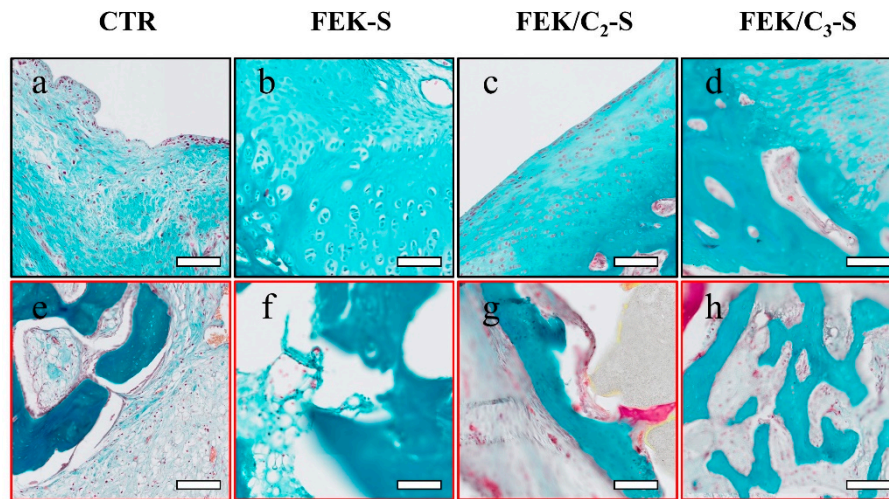

**Figure S8.** High magnification images of (a-d) cartilage and (e-h) subchondral bone with Masson staining. Scale bar: 100  $\mu$ m.
